# Supplementary material for: A new Ce-doped MgAl-LDH@Au nanocatalyst for highly efficient reductive degradation of organic contaminants
Source: Royal Society of Chemistry journal article supplement (doi:10.1039/c6ta10880f), 2017-01-01
Supplement: c6ta10880f1.pdf [file c6ta10880f1.pdf]

## Supplementary Data

*For*

### **New Ce-doped MgAl-LDH@Au Nanocatalyst for Highly Efficient Reductive Degradation of Organic Contaminants**

*Kanwal Iqbal,<sup>a</sup> Anam Iqbal,<sup>a</sup> Alexander M. Kirillov,<sup>b</sup> Bingkai Wang,<sup>a</sup> Weisheng Liu,<sup>a</sup> Yu Tang<sup>\*a</sup>*

<sup>a</sup> State Key Laboratory of Applied Organic Chemistry, Key Laboratory of Nonferrous Metal Chemistry and Resources Utilization of Gansu Province, College of Chemistry and Chemical Engineering, Lanzhou University, Lanzhou 730000, P.R. China

<sup>b</sup> Centro de Quimica Estrutural, Complexo I, Instituto Superior Técnico, Universidade de Lisboa, Av. Rovisco Pais, Lisbon 1049-001, Portugal

## Contents

**Fig. S1** FTIR spectra of MgAl-LDH, MgAlCe-LDH, MgAl-LDH@Au, and MgAlCe-LDH@Au.

**Fig. S2** SEM images of (a) MgAlCe-LDH, (b) MgAl-LDH@Au, and (c) MgAlCe-LDH@Au.

**Fig. S3** EDX spectrum of MgAlCe-LDH@Au.

**Fig. S4** High-resolution XPS spectra of MgAlCe-LDH@Au.

**Fig. S5** TGA curves of MgAl-LDH@Au and MgAlCe-LDH@Au.

**Fig. S6** Time-dependent UV-vis spectra of the reaction mixtures containing aqueous solutions of different dyes in the presence of NaBH<sub>4</sub> as a reducing agent and in the absence of catalyst (blank tests).

**Fig. S7** Time-dependent UV-vis spectra of the reaction mixtures containing aqueous solutions of different dyes in the presence of NaBH<sub>4</sub> as a reducing agent and MgAlCe-LDH@Au as a catalyst.

**Fig. S8** Calibration curves as a function of  $\ln(C_t/C_0)$  vs. reaction time for the reaction mixtures containing aqueous solutions of different dyes in the presence of NaBH<sub>4</sub> as a reducing agent and MgAlCe-LDH@Au as a catalyst.

**Fig. S9** Time-dependent UV-vis spectra of the reaction mixtures containing aqueous solutions of 4-NP or different dyes in the presence of NaBH<sub>4</sub> as a reducing agent and MgAl-LDH@Au as a catalyst.

**Fig. S10** Calibration curves as a function of  $\ln(C_t/C_0)$  vs. reaction time for the reaction mixtures containing aqueous solutions of 4-NP or different dyes in the presence of NaBH<sub>4</sub> as a reducing agent and MgAl-LDH@Au as a catalyst.

**Fig. S11** Time-dependent UV-vis spectra of the reaction mixtures containing aqueous solutions of 4-NP or different dyes in the presence of NaBH<sub>4</sub> as a reducing agent and MgAlCe-LDH as a catalyst.

**Fig. S12** Calibration curves as a function of  $\ln(C_t/C_0)$  vs. reaction time for the reaction mixtures containing aqueous solutions of 4-NP or different dyes in the presence of NaBH<sub>4</sub> as a reducing agent and MgAlCe-LDH as a catalyst.

**Table S1** Comparison of various catalytic systems for the reductive degradation of 4-NP.

**Table S2** Comparison of various catalytic systems for the reductive degradation of different dyes.

**Supplementary References**

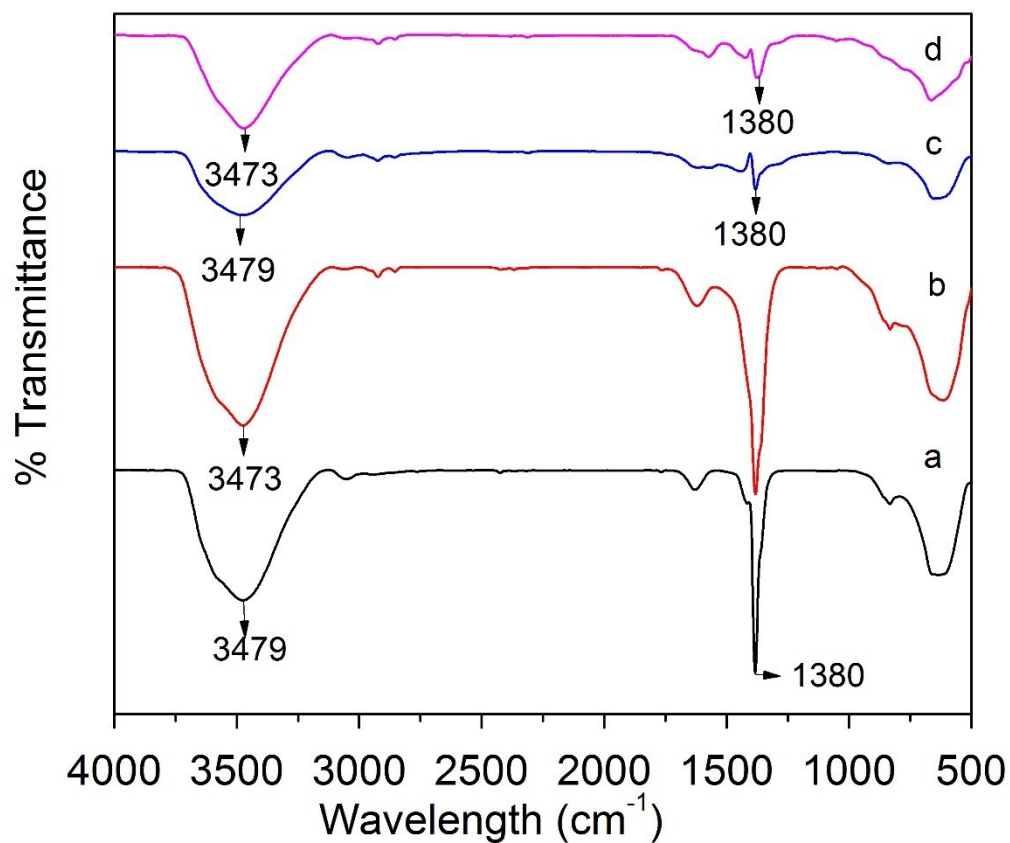

**Fig. S1** FT-IR spectra of MgAl-LDH (a), MgAlCe-LDH (b), MgAl-LDH@Au (c), and MgAlCe-LDH@Au (d)

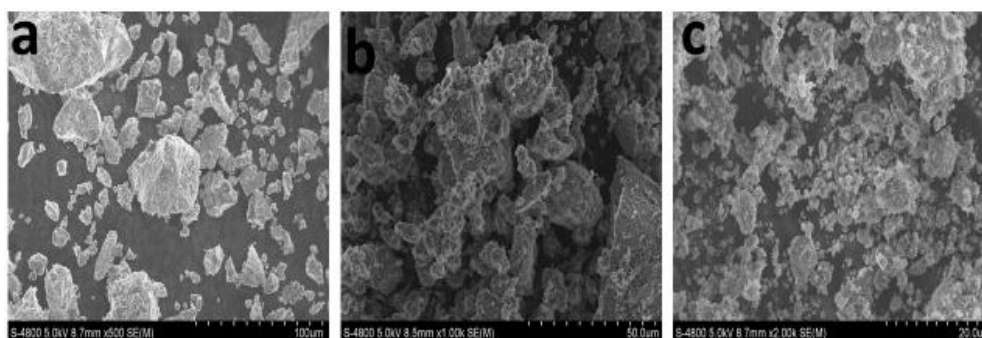

**Fig. S2** SEM images of (a) MgAlCe-LDH, (b) MgAl-LDH@Au, and (c) MgAlCe-LDH@Au.

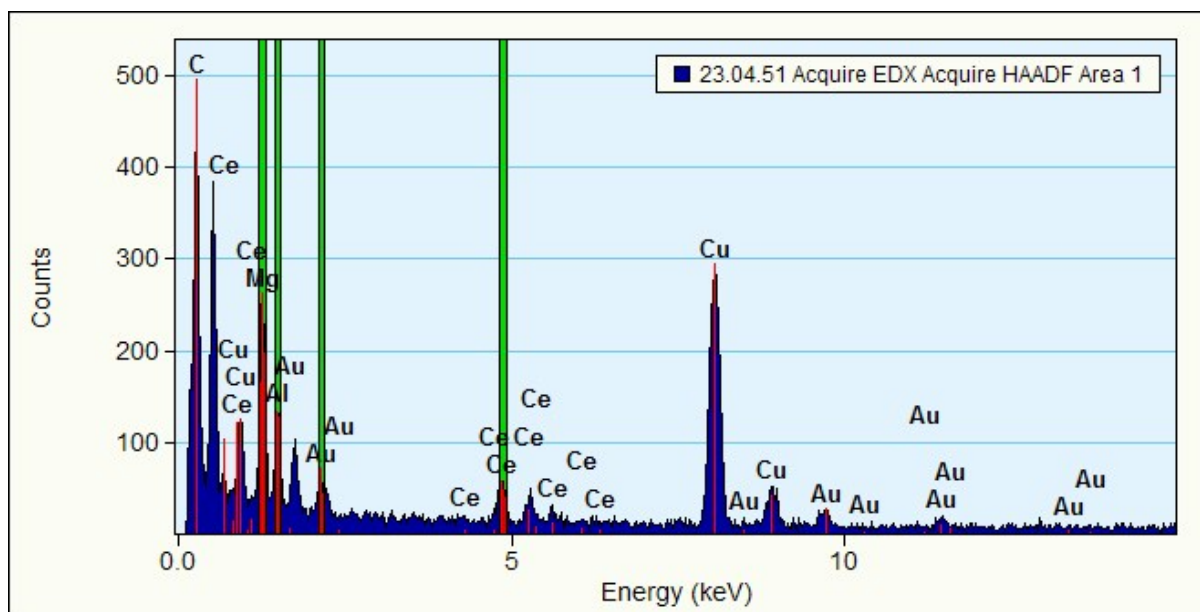

**Fig. S3** EDX spectrum of MgAlCe-LDH@Au. The Cu signals originate from Cu grid.

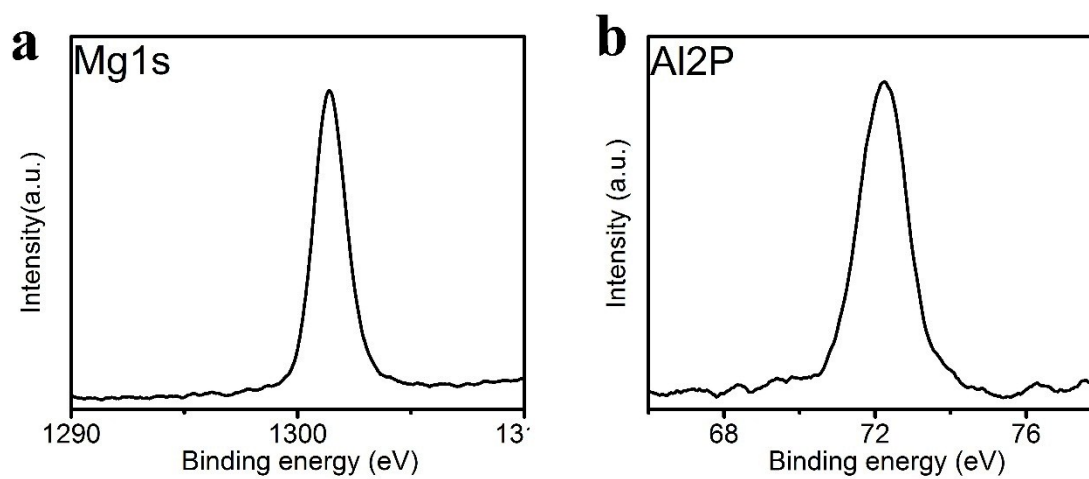

**Fig. S4** High-resolution XPS spectra of MgAlCe-LDH@Au: (a) Mg 1s, (b) Al 2p.

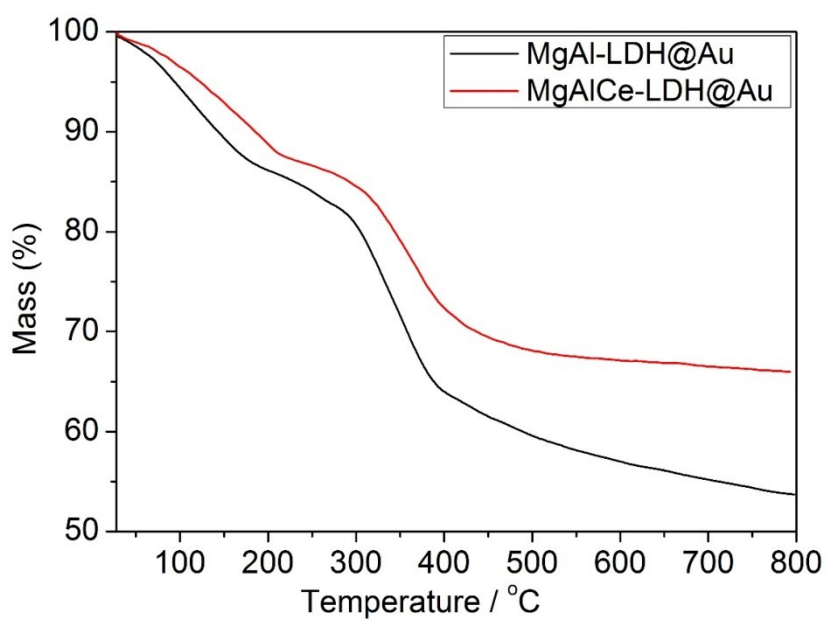

**Fig. S5** TGA curves of MgAl-LDH@Au and MgAlCe-LDH@Au.

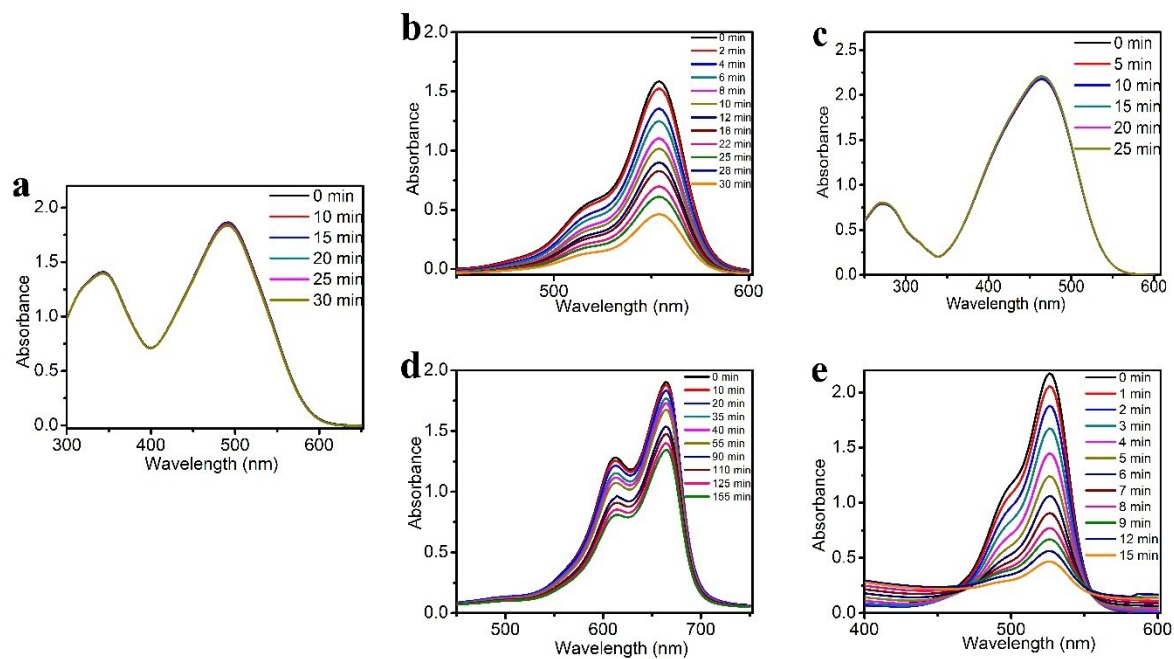

**Fig. S6** Time-dependent UV-vis spectra of the reaction mixtures containing (a) CR, (b) RhB, (c) MO, (d) MB, and (e) R6G aqueous solutions in the presence of  $\text{NaBH}_4$  as a reducing agent and in the absence of catalyst (blank tests). Reaction conditions: 2.5 mL aqueous solutions of (a) CR ( $6 \times 10^{-5}$  M), (b) RhB ( $2 \times 10^{-6}$  M), (c) MO ( $1 \times 10^{-4}$  M), (d) MB ( $3 \times 10^{-5}$  M), (e) R6G ( $4 \times 10^{-4}$  M), and  $\text{NaBH}_4$  (0.1 M, 480  $\mu\text{L}$ ).

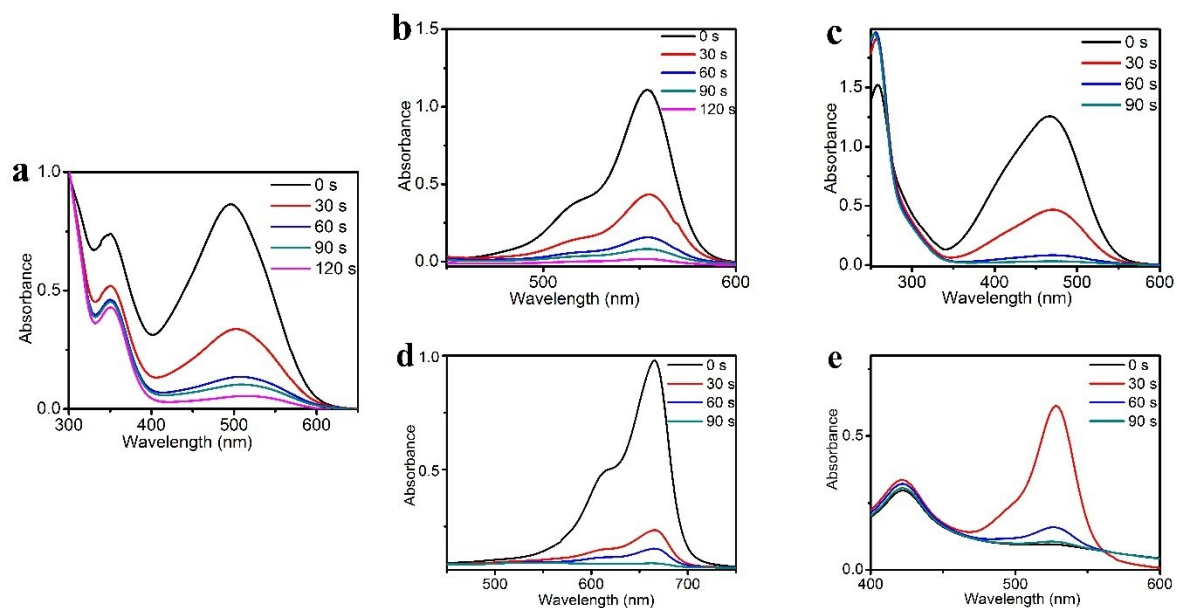

**Fig. S7** Time-dependent UV-vis spectra of the reaction mixtures containing (a) CR, (b) RhB, (c) MO, (d) MB, and (e) R6G aqueous solutions in the presence of NaBH<sub>4</sub> as a reducing agent and MgAlCe-LDH@Au as a catalyst. Reaction conditions: MgAlCe-LDH@Au (20  $\mu$ L, 1 mg/mL), 2.5 mL aqueous solutions of (a) CR ( $6 \times 10^{-5}$  M), (b) RhB ( $2 \times 10^{-6}$  M), (c) MO ( $1 \times 10^{-4}$  M), (d) MB ( $3 \times 10^{-5}$  M), (e) R6G ( $4 \times 10^{-4}$  M), and NaBH<sub>4</sub> (0.1 M, 480  $\mu$ L).

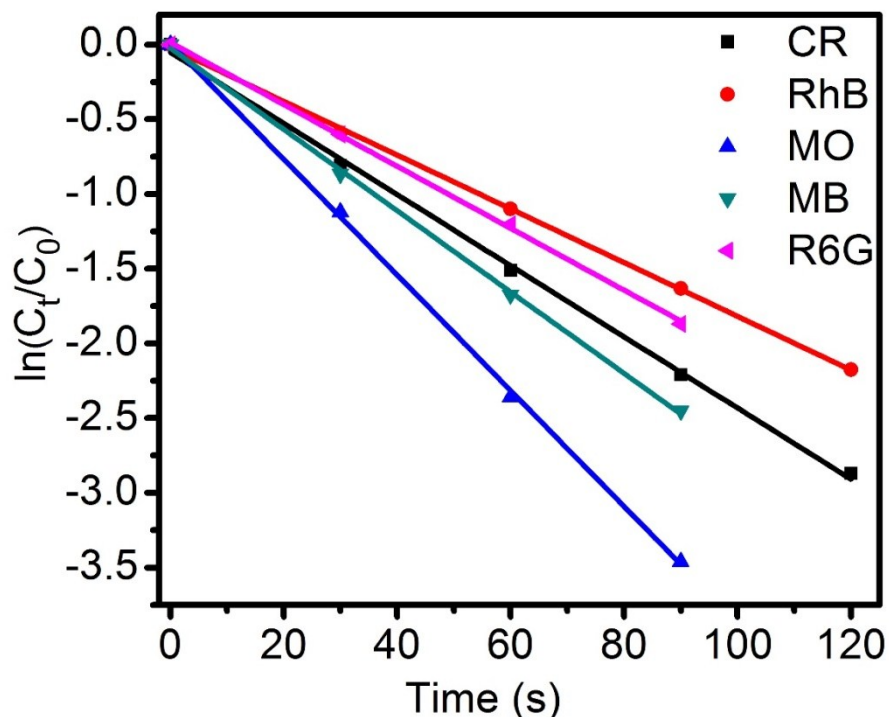

**Fig. S8** Calibration curves as a function of  $\ln(C_t/C_0)$  vs. reaction time for the reaction mixtures containing aqueous solutions of dyes (a) CR, (b) RhB, (c) MO, (d) MB, and (e) R6G in the presence of  $\text{NaBH}_4$  as a reducing agent and  $\text{MgAlCe-LDH@Au}$  ( $20 \mu\text{L}$ ,  $1 \text{ mg/mL}$ ) as a catalyst. Reaction conditions:  $\text{MgAlCe-LDH@Au}$  ( $20 \mu\text{L}$ ,  $1 \text{ mg/mL}$ ),  $2.5 \text{ mL}$  aqueous solutions of (a) CR ( $6 \times 10^{-5} \text{ M}$ ), (b) RhB ( $2 \times 10^{-6} \text{ M}$ ), (c) MO ( $1 \times 10^{-4} \text{ M}$ ), (d) MB ( $3 \times 10^{-5} \text{ M}$ ), (e) R6G ( $4 \times 10^{-4} \text{ M}$ ), and  $\text{NaBH}_4$  ( $0.1 \text{ M}$ ,  $480 \mu\text{L}$ ).



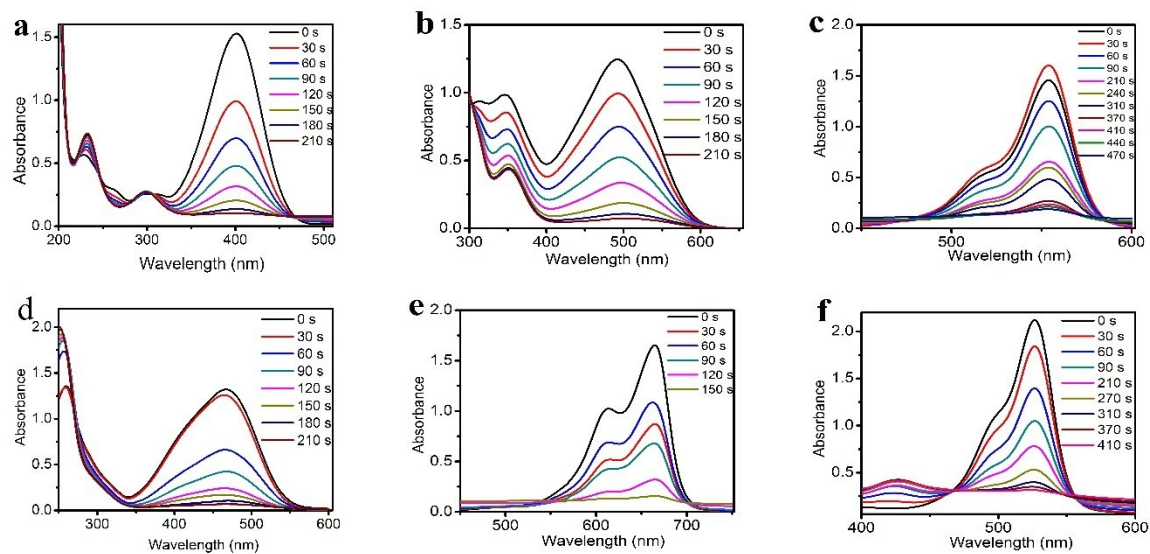

**Fig. S9** Time-dependent UV-vis spectra of the reaction mixtures containing (a) 4-NP, (b) CR, (c) RhB, (d) MO, (e) MB and (f) R6G aqueous solutions in the presence of  $\text{NaBH}_4$  as a reducing agent and  $\text{MgAl-LDH@Au}$  as a catalyst. Reaction conditions:  $\text{MgAl-LDH@Au}$  ( $20 \mu\text{L}$ ,  $1 \text{ mg/mL}$ ),  $2.5 \text{ mL}$  aqueous solutions of (a) 4-NP ( $10 \text{ mM}$ ) (b) CR ( $6 \times 10^{-5} \text{ M}$ ), (c) RhB ( $2 \times 10^{-6} \text{ M}$ ), (d) MO ( $1 \times 10^{-4} \text{ M}$ ), (e) MB ( $3 \times 10^{-5} \text{ M}$ ), (f) R6G ( $4 \times 10^{-4} \text{ M}$ ), and  $\text{NaBH}_4$  ( $0.1 \text{ M}$ ,  $200 \mu\text{L}$  for 4-NP and  $480 \mu\text{L}$  for dyes).

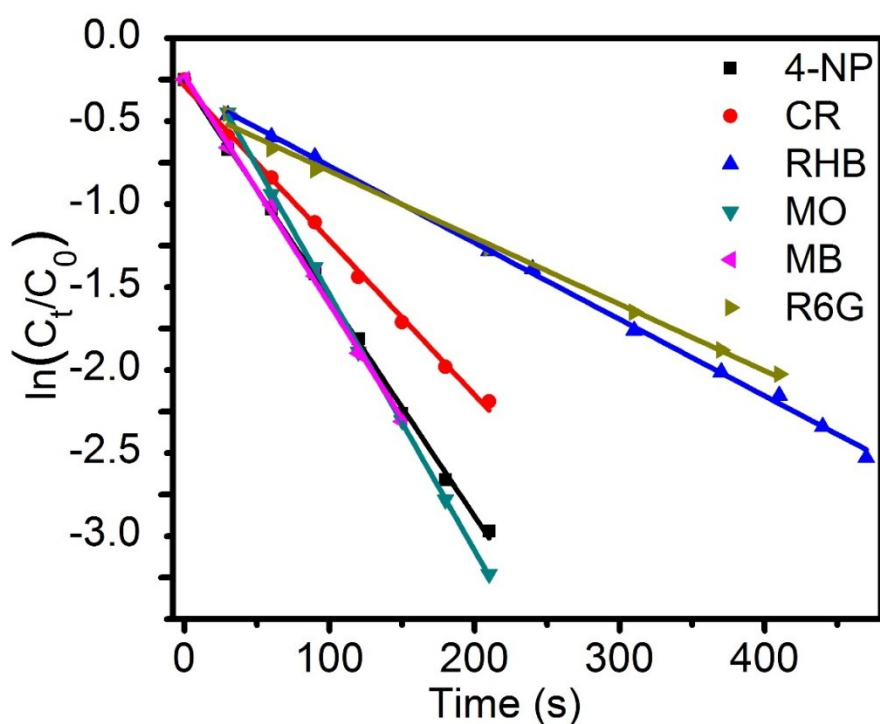

**Fig. S10** Calibration curves as a function of  $\ln(C_t/C_0)$  vs. reaction time for the reaction mixtures containing (a) 4-NP, (b) CR, (c) RhB, (d) MO, (e) MB and (f) R6G aqueous solutions in the presence of  $\text{NaBH}_4$  as a reducing agent and  $\text{MgAl-LDH@Au}$  as a catalyst. Reaction conditions:  $\text{MgAl-LDH@Au}$  (20  $\mu\text{L}$ , 1 mg/mL), 2.5 mL aqueous solutions of (a) 4-NP (10mM) (b) CR ( $6 \times 10^{-5}$  M), (c) RhB ( $2 \times 10^{-6}$  M), (d) MO ( $1 \times 10^{-4}$  M), (e) MB ( $3 \times 10^{-5}$  M), (f) R6G ( $4 \times 10^{-4}$  M), and  $\text{NaBH}_4$  (0.1 M, 200  $\mu\text{L}$  for 4-NP and 480  $\mu\text{L}$  for dyes).

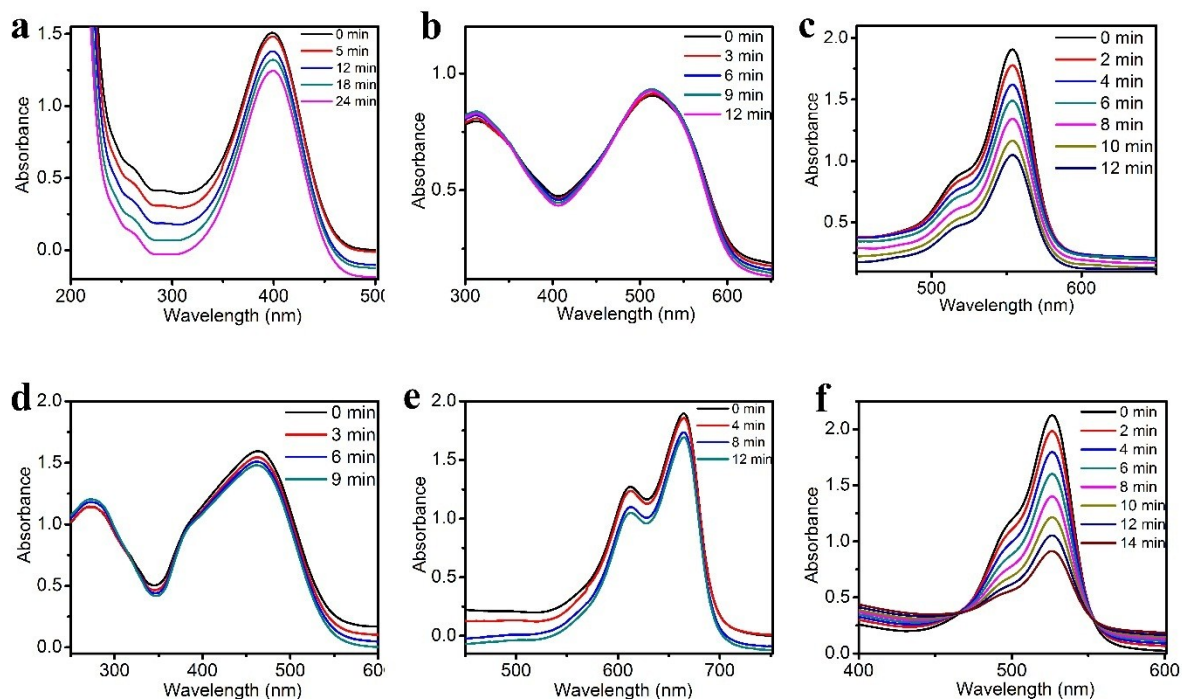

**Fig. S11** Time-dependent UV-vis spectra of the reaction mixtures containing (a) 4-NP, (b) CR, (c) RhB, (d) MO, (e) MB and (f) R6G aqueous solutions in the presence of  $\text{NaBH}_4$  as a reducing agent and MgAlCe-LDH as a catalyst. Reaction conditions: MgAlCe-LDH ( $20 \mu\text{L}$ ,  $1 \text{ mg mL}^{-1}$ ),  $2.5 \text{ mL}$  aqueous solutions of (a) 4-NP ( $10 \text{ mM}$ ), (b) CR ( $6 \times 10^{-5} \text{ M}$ ), (c) RhB ( $2 \times 10^{-6} \text{ M}$ ), (d) MO ( $1 \times 10^{-4} \text{ M}$ ), (e) MB ( $3 \times 10^{-5} \text{ M}$ ), (f) R6G ( $4 \times 10^{-4} \text{ M}$ ), and  $\text{NaBH}_4$  ( $0.1 \text{ M}$ ,  $200 \mu\text{L}$  for 4-NP and  $480 \mu\text{L}$  for dyes).

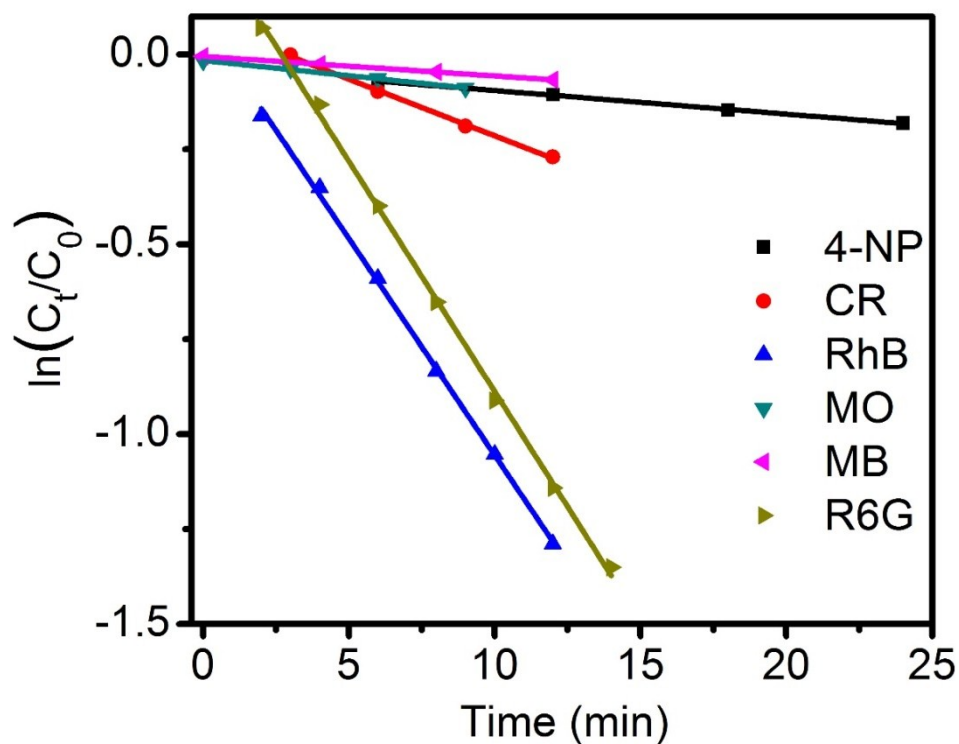

**Fig. S12** Calibration curves as a function of  $\ln(C_t/C_0)$  vs. reaction time for the reaction mixtures containing (a) 4-NP, (b) CR, (c) RhB, (d) MO, (e) MB, and (f) R6G aqueous solutions in the presence of  $\text{NaBH}_4$  as a reducing agent and MgAlCe-LDH as a catalyst. Reaction conditions: MgAlCe-LDH (20  $\mu\text{L}$ , 1 mg/mL), 2.5 mL aqueous solutions of (a) 4-NP (10 mM), (b) CR ( $6 \times 10^{-5}$  M), (c) RhB ( $2 \times 10^{-6}$  M), (d) MO ( $1 \times 10^{-4}$  M), (e) MB ( $3 \times 10^{-5}$  M), (f) R6G ( $4 \times 10^{-4}$  M), and  $\text{NaBH}_4$  (0.1 M, 200  $\mu\text{L}$  for 4-NP and 480  $\mu\text{L}$  for dyes).

**Table S1** Comparison of various catalytic systems for the reductive degradation of 4-NP.

| Catalyst                                          | Support                            | Reaction time (s) | $k_{app}$ (S <sup>-1</sup> )           | TOF (h <sup>-1</sup> )              | Reference        |
|---------------------------------------------------|------------------------------------|-------------------|----------------------------------------|-------------------------------------|------------------|
| Au doped meso-porous Boehmite film                | Boehmite film                      | 1920              | $1.7 \times 10^{-3}$                   | 0.7                                 | S1               |
| PANI nanofiber/Au NPs                             | PANI                               | 300               | $11.7 \times 10^{-3}$                  | 0                                   | S2               |
| AuNPs/SNTs nanocomposite                          | SNTs                               | 280               | $10.6 \times 10^{-3}$                  | 46                                  | S3               |
| AuNPs@CSNFs                                       | CSNFs                              | 960               | $5.9 \times 10^{-3}$                   | 563                                 | S4               |
| Au@HSNs_C                                         | SiO <sub>2</sub>                   | 1800              | $1.0 \times 10^{-3}$                   | 14                                  | S5               |
| AuNPs@ZnO paper                                   | Hydrogel ZnO                       | 240               | $2.4 \times 10^{-3}$                   | 3                                   | S6               |
| Hollow capsule-stabilized Ag NPs                  | PAMAM                              | 1800              | $2.0 \times 10^{-3}$                   | 196                                 | S7               |
| SiO <sub>2</sub> @Au/CeO <sub>2</sub>             | SiO <sub>2</sub> @CeO <sub>2</sub> | 300               | $1.3 \times 10^{-2}$                   | 240                                 | S8               |
| Micelle-supported Ag NPs                          | PNIPAP-b-P4VP                      | 1950              | $1.5 \times 10^{-3}$                   | 16                                  | S9               |
| Au-DEND550-1                                      | Au-DEND-PEG550                     | 350               | $9.4 \times 10^{-3}$                   | 901                                 | S10              |
| Au(0)@TpPa-1                                      | Au(0)@TpTa-1                       | 780               | $5.4 \times 10^{-3}$                   | 9                                   | S11              |
| An NPNs                                           | Peptide                            | 300               | $1.3 \times 10^{-3}$                   | 7                                   | S12              |
| $\alpha$ -CDS capped Au NPs                       | $\alpha$ -CD                       | 600               | $4.7 \times 10^{-3}$                   | 34                                  | S13              |
| Au/graphene hydrogel                              | Graphene                           | 720               | $3.2 \times 10^{-3}$                   | 12                                  | S14              |
| Au NPs                                            | HPEI-IBAm                          | 1140              | -                                      | 120                                 | S15              |
| Au NPs/TWEEN/GO composites                        | TWEEN/GO                           | 840               | $4.2 \times 10^{-3}$                   | 7                                   | S16              |
| Au-EGCG <sub>0.1</sub> -CF                        | EGCG-CF                            | 1800              | $2.4 \times 10^{-3}$                   | 2                                   | S17              |
| DMF-stabilized Au NCs                             | DMF                                | 4200              | $3.0 \times 10^{-3}$                   | 83                                  | S18              |
| Magnetically recoverable Au nanocatalyst          | Chitosan                           | 600               | $1.2 \times 10^{-2}$                   | 50                                  | S19              |
| Au-composite NPs                                  | PDMAEMA-PS                         | 750               | $3.2 \times 10^{-3}$                   | 1                                   | S20              |
| Pt1Au1-RGO                                        | PDA/RGO                            | 1800              | $0.7 \times 10^{-3}$                   | 14                                  | S21              |
| Pt3Au1-PDA/RGO                                    | PDA/RGO                            | 600               | $9.6 \times 10^{-3}$                   | 200                                 | S21              |
| Pt1Au1-PDA/RGO                                    | PDA/RGO                            | 600               | $5.7 \times 10^{-3}$                   | 118                                 | S21              |
| Au-PDA/RGO                                        | PDA/RGO                            | 600               | $2.0 \times 10^{-3}$                   | 42                                  | S21              |
| Au NPs                                            | Solution B                         | 120               | $2.0 \times 10^{-2}$                   | $3.0 \times 10^3$                   | S22              |
| Au NPs                                            | Solution B                         | 200               | $9.0 \times 10^{-3}$                   | $9.0 \times 10^3$                   | S22              |
| Au NPs                                            | Solution B                         | 1320              | $1.0 \times 10^{-3}$                   | $5.5 \times 10^3$                   | S22              |
| Fe <sub>3</sub> O <sub>4</sub> @CTS-Au NPs(A)     | Fe <sub>3</sub> O <sub>4</sub>     | 1320              | $8.6 \times 10^{-3}$                   | 272                                 | S23              |
| Fe <sub>3</sub> O <sub>4</sub> @CTS-Au NPs(G)     | Fe <sub>3</sub> O <sub>4</sub>     | 1320              | $1.7 \times 10^{-2}$                   | 296                                 | S23              |
| Fe <sub>3</sub> O <sub>4</sub> @C16@CTS-Au NPs(A) | Fe <sub>3</sub> O <sub>4</sub>     | 1320              | $2.2 \times 10^{-2}$                   | 413                                 | S23              |
| Fe <sub>3</sub> O <sub>4</sub> @C16@CTS-Au NPs(G) | Fe <sub>3</sub> O <sub>4</sub>     | 100               | $3.1 \times 10^{-2}$                   | 440                                 | S23              |
| <b>MgAl-LDH@Au</b>                                | <b>MgAl-LDH</b>                    | <b>210</b>        | <b><math>1.3 \times 10^{-2}</math></b> | <b><math>3.4 \times 10^5</math></b> | <b>This work</b> |
| <b>MgAlCe-LDH@Au</b>                              | <b>MgAlCe-LDH</b>                  | <b>60</b>         | <b><math>4.1 \times 10^{-2}</math></b> | <b><math>1.2 \times 10^6</math></b> | <b>This work</b> |

**Table S2** Comparison of various catalytic systems for the reductive degradation of dyes: methylene blue (MB), methyl orange (MO), Congo red (CR), rhodamine B (RhB), and rhodamine 6G (R6G).

| Catalyst                                            | Support                           | Dye        | Dye concentration                        | Reaction time (s) | $k_{app}$ (s <sup>-1</sup> )           | TOF (h <sup>-1</sup> )              | Reference        |
|-----------------------------------------------------|-----------------------------------|------------|------------------------------------------|-------------------|----------------------------------------|-------------------------------------|------------------|
| sFe <sub>3</sub> O <sub>4</sub> @C16@CT S-Au NPs(G) | Fe <sub>3</sub> O <sub>4</sub>    | MB         | $3.0 \times 10^{-5}$ M                   | 100               | $3.0 \times 10^{-8}$                   | 114                                 | S23              |
| Au Nps/MCNCS                                        | CNSs                              | MB         | 1 mM                                     | 720               | $3.3 \times 10^{-3}$                   | 0                                   | S24              |
| Fe <sub>3</sub> O <sub>4</sub> @C@Au Nps            | Fe <sub>3</sub> O <sub>4</sub> @C | MB         | $1.0 \times 10^{-7}$ M                   | 600               | $5.0 \times 10^{-3}$                   | 0                                   | S25              |
| Au@TA-GH                                            | Graphene                          | MB         | 0.63 $\mu$ M                             | 540               | $2.0 \times 10^{-3}$                   | 26                                  | S26              |
| Au NPs                                              | P.benghalensis                    | MB         | 10 mg mL <sup>-1</sup>                   | 480               | $2.9 \times 10^{-3}$                   | -                                   | S27              |
| Au/KNbO <sub>3</sub>                                | KNbO <sub>3</sub>                 | MB         | $4.0 \times 10^{-5}$ M                   | 7200              | $2.0 \times 10^{-4}$                   | 0.05                                | S28              |
| Au NPs                                              | S.acuminata fruit extract         | MB         | 10 <sup>-4</sup> N                       | 720               | $7.0 \times 10^{-4}$                   | 0                                   | S29              |
| Au NPs                                              | Kashayam                          | MB         | $9.4 \times 10^{-5}$ M                   | 300               | $5.5 \times 10^{-3}$                   | 0                                   | S30              |
| Au NPs                                              | Punica granatum                   | MB         | 1 mM                                     | 900               | $6.0 \times 10^{-3}$                   | 0                                   | S28              |
| <b>MgAlCe-LDH@Au</b>                                | <b>MgAlCe-LDH</b>                 | <b>MB</b>  | <b><math>3.0 \times 10^{-5}</math> M</b> | <b>90</b>         | <b><math>3 \times 10^{-3}</math></b>   | <b><math>2.2 \times 10^3</math></b> | <b>This work</b> |
| Fe <sub>3</sub> O <sub>4</sub> @C16@CTS-Au NPs(G)   | Fe <sub>3</sub> O <sub>4</sub>    | MO         | $1.0 \times 10^{-4}$ M                   | 120               | $2.0 \times 10^{-2}$                   | 304                                 | S23              |
| Au NPs                                              | Punica granatum                   | MO         | 1 mM                                     | 900               | $3.0 \times 10^{-3}$                   | 0                                   | S28              |
| Au NPs                                              | S.acuminata fruit extract         | MO         | 10 <sup>-4</sup> N                       | 720               | $6.0 \times 10^{-4}$                   | 0                                   | S30              |
| <b>MgAlCe-LDH@Au</b>                                | <b>MgAlCe-LDH</b>                 | <b>MO</b>  | <b><math>1.0 \times 10^{-4}</math> M</b> | <b>90</b>         | <b><math>4.0 \times 10^{-2}</math></b> | <b><math>8.0 \times 10^3</math></b> | <b>This work</b> |
| Fe <sub>3</sub> O <sub>4</sub> @C16@CTS-Au NPs(G)   | Fe <sub>3</sub> O <sub>4</sub>    | CR         | $6.0 \times 10^{-5}$ M                   | 150               | $1.3 \times 10^{-2}$                   | 149                                 | S19              |
| <b>MgAlCe-LDH@Au</b>                                | <b>MgAlCe-LDH</b>                 | <b>CR</b>  | <b><math>6.0 \times 10^{-5}</math> M</b> | <b>120</b>        | <b><math>2.4 \times 10^{-2}</math></b> | <b><math>3.3 \times 10^3</math></b> | <b>This work</b> |
| Fe <sub>3</sub> O <sub>4</sub> @C16@CTS-Au NPs(G)   | Fe <sub>3</sub> O <sub>4</sub>    | RhB        | $2.0 \times 10^{-6}$ M                   | 140               | $1.6 \times 10^{-2}$                   | 4.8                                 | S19              |
| <b>MgAlCe-LDH@Au</b>                                | <b>MgAlCe-LDH</b>                 | <b>RhB</b> | <b><math>2.0 \times 10^{-6}</math> M</b> | <b>120</b>        | <b><math>2.0 \times 10^{-2}</math></b> | <b>111</b>                          | <b>This work</b> |
| Fe <sub>3</sub> O <sub>4</sub> @C16@CTS-Au NPs(G)   | Fe <sub>3</sub> O <sub>4</sub>    | R6G        | $4.0 \times 10^{-4}$ M                   | 240               | $1.0 \times 10^{-2}$                   | 626                                 | S19              |
| <b>MgAlCe-LDH@Au</b>                                | <b>MgAlCe-LDH</b>                 | <b>R6G</b> | <b><math>4.0 \times 10^{-4}</math> M</b> | <b>90</b>         | <b><math>2.1 \times 10^{-2}</math></b> | <b><math>2.9 \times 10^4</math></b> | <b>This work</b> |

## Supplementary References

- S1. D. Jana, A. Dandapat and G. De, *Langmuir.*, 2010, 26, 12177-12184.
- S2. J. Han, L. Li and R. Guo, *Macromolecules.*, 2010, 43, 10636-10644.
- S3. Z. Zhang, C. Shao, P. Zou, P. Zhang, M. Zhang, J. Mu, Z. Guo, X. Li, C. Wang and Y. Liu, *Chem. Commun.*, 2011, 47, 3906-3908.
- S4. H. Koga, E. Tokunaga, M. Hidaka, Y. Umemura, T. Saito, A. Isogai and T. Kitaoka, *Chem. Commun.*, 2010, 46, 8567-8569.
- S5. S.-H. Wu, C.-T. Tseng, Y.-S. Lin, C.-H. Lin, Y. Hung and C.-Y. Mou, *J. Mater. Chem.*, 2011, 21, 789-794.
- S6. H. Koga and T. Kitaoka, *Chem. Eng. J.*, 2011, 168, 420-425.
- S7. H. Wu, Z. Liu, X. Wang, B. Zhao, J. Zhang and C. Li, *J. Colloid. Interf. Sci.*, 2006, 302, 142-148.
- S8. B. Liu, S. Yu, Q. Wang, W. Hu, P. Jing, Y. Liu, W. Jia, Y. Liu, L. Liu and J. Zhang, *Chem. Commun.*, 2013, 49, 3757-3759.
- S9. Y. Wang, G. Wei, W. Zhang, X. Jiang, P. Zheng, L. Shi and A. Dong, *J. Mater. Chem. A.*, 2007, 266, 233-238.
- S10. N. Li, M. Echeverria, S. Moya, J. Ruiz and D. Astruc, *Inorg. Chem.*, 2014, 53, 6954-6961.
- S11. P. Pachfule, S. Kandambeth, D. D. Díaz and R. Banerjee, *Chem. Commun.*, 2014, 50, 3169-3172.
- S12. R. Bhandari and M. R. Knecht, *Catal. Sci. Technol.*, 2012, 2, 1360-1366.
- S13. T. Huang, F. Meng and L. Qi, *J. Phys. Chem. C.*, 2009, 113, 13636-13642.
- S14. J. Li, C.-y. Liu and Y. Liu, *J. Mater. Chem.*, 2012, 22, 8426-8430.
- S15. X.-Y. Liu, F. Cheng, Y. Liu, H.-J. Liu and Y. Chen, *J. Mater. Chem.*, 2010, 20, 360-368.
- S16. W. Lu, R. Ning, X. Qin, Y. Zhang, G. Chang, S. Liu, Y. Luo and X. Sun, *J. Hazard. Mater.*, 2011, 197, 320-326.
- S17. H. Wu, X. Huang, M. Gao, X. Liao and B. Shi, *Green. Chem.*, 2011, 13, 651-658.
- S18. H. Yamamoto, H. Yano, H. Kouchi, Y. Obora, R. Arakawa and H. Kawasaki, *Nanoscale.*, 2012, 4, 4148-4154.
- S19. Y.-C. Chang and D.-H. Chen, *J. Hazard. Mater.*, 2009, 165, 664-669.
- S20. M. Zhang, L. Liu, C. Wu, G. Fu, H. Zhao and B. He, *Polymer.*, 2007, 48, 1989-1997.
- S21. W. Ye, J. Yu, Y. Zhou, D. Gao, D. Wang, C. Wang and D. Xue *Appl. Catal. B Environ.*, 2016, 181, 371-378.
- S22. C. Deraedt, L. Salmon, S. Gatard, R. Ciganda, R. Hernandez, J. Ruiz and D. Astruc, *Chem. Commun.*, 2014, 50, 14194-14196.
- S23. J. Hu, Y.-l. Dong, Z. ur Rahman, Y.-h. Ma, C.-l. Ren and X.-g. Chen, *Chem. eng. J.*, 2014, 254, 514-523.
- S24. W. Zuo, G. Chen, F. Chen, S. Li and B. Wang, *RSC. Adv.*, 2016, 6, 28774-28780.
- S25. Z. Gan, A. Zhao, M. Zhang, W. Tao, H. Guo, Q. Gao, R. Mao and E. Liu, *Dalton Trans.*, 2013, 42, 8597-8605.
- S26. J. Luo, N. Zhang, J. Lai, R. Liu and X. Liu, *J. Hazard. Mater.*, 2015, 300, 615-623.
- S27. B. Paul, B. Bhuyan, D. D. Purkayastha, M. Dey and S. S. Dhar, *Mater. Lett.*, 2015, 148, 37-40.
- S28. L. Yan, T. Zhang, W. Lei, Q. Xu, X. Zhou, P. Xu, Y. Wang and G. Liu, *Catal. Today.*, 2014, 224, 140-146.
- S29. V. Suvith and D. Philip, *Spectrochim. Acta A Mol. Biomol. Spectrosc.*, 2014, 118, 526-532.
- S30. M. Meena Kumari and D. Philip, *Spectrochim. Acta A Mol. Biomol. Spectrosc.*, 2015, 135, 632-638.
